# Supplementary material for: Differential impact of self and environmental antigens on the ontogeny and maintenance of CD4+ T cell memory
Source: eLife. 2019 Nov 19;8:e48901. doi: 10.7554/eLife.48901 (PMC6905650; doi:10.7554/eLife.48901)
Supplement: Source data 1. [file elife-48901-data1.xlsx]

## Sheet: UCL & NIMR adult chimeras data
Location and mouse type	Mouse age (days)	Mouse age @ BMT (days)	Days post BMT	Naive CD4 cell counts	Central memory CD4 cell counts	Effector memory CD4 cell counts	Donor Naive CD4 cell counts	Donor central memory CD4 cell counts	Donor effector memory CD4 cell counts	Normalised chimerism in naive CD4	Normalised chimerism in central memory CD4	Normalised chimerism in effector memory CD4
NIMR chimera	84	56	28	35859000	859150	4734940	659000	3150	4940	0.0493675	0.0056004	0.0026893
NIMR chimera	84	56	28	37163000	562100	4110740	1163000	4100	10740	0.0774029	0.0227084	0.00439976
NIMR chimera	98	56	42	47790000	1451300	6111900	8290000	91300	130900	0.261873	0.0803017	0.0280283
NIMR chimera	98	56	42	48550000	1539800	7018500	5050000	46800	58500	0.138586	0.0334484	0.00647875
NIMR chimera	98	56	42	36520000	929400	5800400	5520000	35400	100400	0.199105	0.0411356	0.0190502
NIMR chimera	98	56	42	31050000	825300	3671000	4950000	41300	81000	0.256003	0.0658652	0.0288771
NIMR chimera	119	56	63	29550000	768200	4482700	4750000	39200	113700	0.420968	0.121442	0.0531766
NIMR chimera	119	56	63	24160000	678700	3433800	4520000	48700	160800	0.500068	0.203354	0.112157
NIMR chimera	119	56	63	32520000	816900	6698000	12730000	160900	548000	0.544726	0.27181	0.10351
NIMR chimera	119	56	63	30562000	706500	4624970	1062000	8500	44970	0.890139	0.225556	0.215659
NIMR chimera	140	56	84	18390000	490600	4712000	8690000	95700	466000	0.598882	0.233435	0.103871
NIMR chimera	140	56	84	31610000	899000	8667000	15080000	159000	835000	0.671138	0.239363	0.119731
NIMR chimera	140	56	84	25300000	628300	8303000	8740000	100400	715000	0.669397	0.303465	0.154323
NIMR chimera	140	56	84	29940000	733100	8082000	12770000	117100	682000	0.57259	0.204901	0.0973732
NIMR chimera	168	56	112	38220000	1127200	10935000	15520000	226200	1225000	0.646592	0.315816	0.155459
NIMR chimera	168	56	112	45170000	877800	12016000	20570000	210800	1566000	0.768245	0.378444	0.190495
NIMR chimera	168	56	112	33060000	1031100	14375000	16900000	280100	2115000	0.759898	0.404642	0.18919
NIMR chimera	168	56	112	21130000	608500	10137000	13440000	220700	1793000	0.764106	0.436686	0.197306
NIMR chimera	196	56	140	27080000	1415600	11478000	14040000	338600	1538000	0.747165	0.329483	0.169023
NIMR chimera	196	56	140	46430000	1930400	18936000	9880000	215400	1196000	0.839841	0.434259	0.239377
NIMR chimera	259	56	203	13360000	476400	8687000	4630000	91400	1327000	0.676115	0.345662	0.232638
NIMR chimera	259	56	203	10330000	291400	6419000	4900000	78900	1325000	0.964516	0.520551	0.389745
NIMR chimera	259	56	203	14190000	317400	7779000	7490000	112300	2099000	0.956366	0.607925	0.467053
NIMR chimera	259	56	203	13350000	398600	8746000	6470000	106000	1606000	0.729856	0.391865	0.263715
NIMR chimera	420	56	364	2670000	309200	9073000	753000	41600	963000	0.779535	0.376779	0.285564
NIMR chimera	420	56	364	5223000	538000	18154000	1683000	117000	3764000	0.767294	0.522213	0.482577
NIMR chimera	420	56	364	4793000	300800	10335000	2990000	133800	3332000	0.964884	0.689234	0.484555
UCL chimera	114	61	53	1.9709e+07	423820	2.98538e+06	9.04227e+06	87811.2	436211	0.572379	0.241765	0.159246
UCL chimera	114	61	53	2.05862e+07	353112	2.57838e+06	1.31793e+07	123695	601761	0.680177	0.361717	0.223104
UCL chimera	114	61	53	1.5185e+07	174801	2.10376e+06	7.94181e+06	39840.1	327968	0.595779	0.259618	0.133647
UCL chimera	114	61	53	1.77619e+07	184658	1.9479e+06	1.11505e+07	64896.7	563922	0.678927	0.372818	0.283585
UCL chimera	218	162	56	2.19736e+07	315290	2.74917e+06	1.49234e+07	131966	701447	0.679601	0.421755	0.231111
UCL chimera	163	107	56	1.67286e+07	223343	1.81573e+06	1.15049e+07	104243	543903	0.704503	0.487594	0.313888
UCL chimera	118	62	56	1.70107e+07	171083	1.63927e+06	1.23775e+07	76845	479572	0.793797	0.466707	0.299573
UCL chimera	260	162	98	2.63147e+07	482882	7.49004e+06	1.98133e+07	281066	3.23585e+06	0.7802	0.635095	0.431718
UCL chimera	213	115	98	4.64962e+07	575246	8.01827e+06	3.82664e+07	362320	3.58438e+06	0.839993	0.680252	0.454348
UCL chimera	199	101	98	2.14025e+07	202586	4.76216e+06	1.82011e+07	148237	2.49796e+06	0.857476	0.746004	0.52019
UCL chimera	158	60	98	1.72331e+07	217286	3.5052e+06	1.51944e+07	150515	1.90597e+06	0.90963	0.688565	0.544982
UCL chimera	302	162	140	9.33255e+06	211364	3.30316e+06	7.94244e+06	147253	1.52427e+06	0.865053	0.712425	0.467679
UCL chimera	255	115	140	6.6565e+06	131008	3.71663e+06	5.88907e+06	91477.2	1.66584e+06	0.972815	0.757971	0.473954
UCL chimera	241	101	140	9.21783e+06	181254	3.18121e+06	8.49599e+06	138843	2.06079e+06	0.948001	0.793717	0.681965
UCL chimera	200	60	140	1.49887e+07	263301	3.94988e+06	1.29167e+07	191676	2.02957e+06	0.936792	0.78878	0.557811
UCL chimera	202	146	56	9.96491e+06	188071	2.03085e+06	7.83716e+06	80616.1	457208	0.816252	0.428395	0.181978
UCL chimera	174	118	56	1.32499e+07	206931	2.4299e+06	6.97904e+06	69624	328398	0.572535	0.357774	0.110037
UCL chimera	122	66	56	1.91343e+07	315330	1.35083e+06	7.75561e+06	78476.2	185649	0.492298	0.288719	0.153832
UCL chimera	207	118	89	1.36512e+07	286360	1.51095e+06	8.43811e+06	119916	367480	0.737233	0.482563	0.255518
UCL chimera	177	88	89	1.00458e+07	225418	1.24513e+06	7.14786e+06	114013	432426	0.778455	0.548256	0.33744
UCL chimera	155	66	89	1.1773e+07	195811	1.37417e+06	7.63844e+06	90287.7	405903	0.824441	0.550571	0.335709
UCL chimera	305	81	224	1.19649e+07	337299	2.05805e+06	1.0063e+07	255488	1.19267e+06	0.956435	0.851901	0.64996
UCL chimera	282	58	224	9.80077e+06	232634	1.89295e+06	8.3278e+06	176942	1.15854e+06	0.938089	0.846543	0.654658
UCL chimera	98	72	26	1.58211e+07	333246	2.67438e+06	764693	6668.01	11475.8	0.11022	0.0467541	0.0090032
UCL chimera	102	76	26	1.86124e+07	283118	2.04574e+06	1.68867e+06	14142.6	19727	0.0945115	0.0573795	0.00951918
UCL chimera	116	76	40	1.75328e+07	281204	1.45008e+06	6.00271e+06	48384.6	139481	0.454045	0.224055	0.121528
UCL chimera	112	72	40	1.9407e+07	327208	2.38509e+06	6.74189e+06	42157.4	153046	0.398998	0.144749	0.072538
UCL chimera	112	72	40	1.39996e+07	213198	1.39223e+06	4.04983e+06	22436	79638.8	0.361755	0.124688	0.0772467
UCL chimera	304	58	246	6.76274e+06	183200	2.87749e+06	5.53188e+06	137410	1.6833e+06	0.93235	0.847501	0.642232
UCL chimera	304	58	246	8.2029e+06	175422	2600336	5.4183e+06	108609	1.3514e+06	0.990347	0.950307	0.760632
UCL chimera	327	81	246	1.34424e+07	315311	2.94623e+06	1.13003e+07	239277	1.80593e+06	0.926564	0.821261	0.643368
UCL chimera	327	81	246	7.81605e+06	107830	2.74909e+06	7.08454e+06	88497.6	1.8162e+06	0.971841	0.872241	0.667491
UCL chimera	326	80	246	6.82042e+06	215040	3.24559e+06	5.99581e+06	175961	2.09049e+06	0.975921	0.905709	0.694238
UCL chimera	326	80	246	7.66976e+06	252207	4.4998e+06	6.43205e+06	183035	2.54126e+06	0.939135	0.819602	0.614462
UCL chimera	326	80	246	8.19769e+06	219518	3.02996e+06	6.6462e+06	158025	1.69132e+06	0.935913	0.836837	0.615543
UCL chimera	326	80	246	1.31041e+07	334649	3.46299e+06	1.1192e+07	253812	2.1627e+06	0.954485	0.874419	0.720137
UCL chimera	304	58	246	1.23477e+07	324631	4.99472e+06	9.86035e+06	232236	2.81843e+06	0.94144	0.86979	0.624981
UCL chimera	304	58	246	1.38676e+07	339910	4.48799e+06	1.16108e+07	258827	2.74525e+06	0.971135	0.898672	0.686624
UCL chimera	304	58	246	1.37291e+07	294982	3.06983e+06	1.10826e+07	219196	1.85792e+06	0.963362	0.881178	0.691618
UCL chimera	304	58	246	1.46443e+07	353646	3.55322e+06	1.06529e+07	237267	1.88223e+06	0.870073	0.829935	0.592511
UCL chimera	312	66	246	1.25019e+07	253471	3.05024e+06	9.24955e+06	166070	1.61525e+06	0.947878	0.869614	0.641919
UCL chimera	326	66	260	1.80347e+07	751491	4.41243e+06	1.45424e+07	526565	2.66462e+06	0.939344	0.824795	0.651554
UCL chimera	318	58	260	1.18483e+07	434844	3.58165e+06	9.36704e+06	308886	2e+06	0.927635	0.836554	0.624552
UCL chimera	340	80	260	1.41658e+07	454550	3.27911e+06	9.60768e+06	264942	1.48312e+06	0.924409	0.785415	0.571773
UCL chimera	318	58	260	1.7997e+07	499419	3.33982e+06	1.54898e+07	375828	2.0648e+06	0.965848	0.833278	0.655491
UCL chimera	341	81	260	1.20236e+07	414317	3.87232e+06	9.33499e+06	283997	2.1552e+06	0.978483	0.866969	0.662698
UCL chimera	341	81	260	1.06322e+07	376053	3.56688e+06	7.46722e+06	252939	1.94532e+06	0.859814	0.822885	0.614532
UCL chimera	340	80	260	1.40393e+07	363847	3.29273e+06	1.08777e+07	252986	1.91886e+06	1.02732	0.936163	0.721033
UCL chimera	327	67	260	1.46811e+07	385056	3.50137e+06	1.18221e+07	267779	1.87302e+06	0.932326	0.819897	0.594425
UCL chimera	337	77	260	1.07452e+07	362370	3.97556e+06	6.71198e+06	193337	1.78872e+06	0.908672	0.763709	0.641398
UCL chimera	338	78	260	1.38211e+07	429492	3.62439e+06	9.28269e+06	232398	1.6188e+06	0.898768	0.710188	0.533697
UCL chimera	318	58	260	1.14007e+07	348567	2.28942e+06	8.01716e+06	217104	1.1127e+06	0.94119	0.814508	0.596691
UCL chimera	318	58	260	1.2055e+07	381803	3.57564e+06	7.82685e+06	215075	1.79929e+06	0.981751	0.822914	0.721239
UCL chimera	318	58	260	8.5143e+06	237887	2.83499e+06	4.06711e+06	106683	1.23719e+06	0.892371	0.844974	0.833796
UCL chimera	318	58	260	1.49916e+07	344083	3.31089e+06	1.1584e+07	237064	1.84597e+06	0.995723	0.877992	0.661472
UCL chimera	170	75	95	2.22096e+07	496984	3.50978e+06	1.75668e+07	311628	1.42734e+06	0.864108	0.678497	0.419287
UCL chimera	170	75	95	2.54164e+07	457297	5.07289e+06	2.07473e+07	313701	2.50188e+06	0.857731	0.725798	0.520174
UCL chimera	170	75	95	1.42164e+07	228314	2.3073e+06	1.23596e+07	154510	1.04543e+06	0.944546	0.714047	0.461945
UCL chimera	170	75	95	1.24022e+07	190736	2.92077e+06	9.09829e+06	104002	1.0855e+06	0.924509	0.655359	0.44701
UCL chimera	170	75	95	1.64071e+07	298133	2.13528e+06	1.22549e+07	165395	882682	0.88867	0.656862	0.474103
UCL chimera	170	75	95	2.60997e+07	350913	4.5197e+06	2.06932e+07	214632	2.18889e+06	0.82758	0.621338	0.481616
UCL chimera	170	75	95	1.79329e+07	333335	2.95146e+06	1.42493e+07	203903	1.21765e+06	0.843144	0.636964	0.419291
UCL chimera	169	74	95	1.22769e+07	254729	2.41907e+06	9.30764e+06	143477	716999	0.831223	0.623185	0.293935
UCL chimera	170	75	95	1.19224e+07	292260	4.11145e+06	1.04825e+07	206875	1.70505e+06	0.926017	0.732276	0.402593
UCL chimera	170	75	95	1.39982e+07	203601	2.37643e+06	1.12702e+07	125107	996251	0.972304	0.763362	0.4438
UCL chimera	170	75	95	1.37203e+07	286536	4.29017e+06	9.81978e+06	156710	1.50023e+06	0.904326	0.678204	0.429117
UCL chimera	137	76	61	2.59186e+07	482752	2.19912e+06	8.68388e+06	85318.2	235386	0.563887	0.273417	0.15875
UCL chimera	137	76	61	2.23223e+07	913094	2.7001e+06	1.2578e+07	323480	576528	0.720931	0.451854	0.258132
UCL chimera	137	76	61	2.90196e+07	473525	2.27495e+06	1.78398e+07	183496	573721	0.709432	0.431158	0.266287
UCL chimera	133	51	82	2.27416e+07	702159	3.34551e+06	1.54652e+07	326835	912015	0.737952	0.502855	0.272069
UCL chimera	133	51	82	1.65511e+07	365735	1.58923e+06	1.01578e+07	164264	472853	0.773459	0.565332	0.357551
UCL chimera	149	67	82	1.37203e+07	486633	1.70571e+06	7.63998e+06	183009	424388	0.779466	0.518837	0.334098
UCL chimera	347	146	201	6.82065e+06	242831	1.5531e+06	6.00664e+06	186880	771710	1.04131	0.932507	0.569275
UCL chimera	319	118	201	9.20985e+06	287703	2.29108e+06	7.37928e+06	191891	1.19419e+06	0.926888	0.773855	0.587839
UCL chimera	266	65	201	8.26008e+06	197486	1.1858e+06	3.58907e+06	71983.4	346461	0.852477	0.756184	0.538511
UCL chimera	266	65	201	9.19582e+06	273037	2.05204e+06	6.69424e+06	149633	897049	0.958645	0.705824	0.516498
UCL chimera	102	69	33	2.35483e+07	418185	2.26263e+06	7.57126e+06	50062.5	118802	0.325122	0.104849	0.0486015
UCL chimera	87	54	33	2.25935e+07	505105	1.98856e+06	7.88535e+06	56127.4	108131	0.380587	0.106671	0.0586765
UCL chimera	78	45	33	2.47473e+07	381678	1.74272e+06	8.37549e+06	60160.7	126323	0.352731	0.117047	0.0798871
UCL chimera	116	69	47	2.49648e+07	565743	2.47728e+06	1.19424e+07	155102	262730	0.526373	0.281418	0.108804
UCL chimera	101	54	47	2.61335e+07	553656	1.86793e+06	1.24708e+07	147263	266901	0.592856	0.313038	0.177565
UCL chimera	92	45	47	2.52778e+07	482094	1.91298e+06	1.14146e+07	110127	271175	0.569858	0.266794	0.175638
UCL chimera	442	178	264	2.53962e+06	218981	3.04027e+06	2.18249e+06	159339	1.65152e+06	1.00727	0.855118	0.617332
UCL chimera	382	118	264	7.62781e+06	338701	2.70919e+06	5.54622e+06	211121	1.3205e+06	0.875776	0.716475	0.554659
UCL chimera	330	66	264	9.01613e+06	287970	2.48942e+06	5.48791e+06	157844	998014	0.971806	0.858393	0.583038
UCL chimera	192	40	152	1.58176e+07	389444	2.43033e+06	1.32823e+07	265787	1.27354e+06	0.887963	0.722608	0.549336
UCL chimera	192	40	152	1.54133e+07	438048	2.33648e+06	8.30469e+06	165524	749703	0.86454	0.593598	0.502337
UCL chimera	273	121	152	8.77912e+06	276584	1.98019e+06	7.59185e+06	193627	1.08394e+06	0.900607	0.729284	0.545649

## Sheet: WT UCL young mice data
Location and mouse type	Mouse age (days)	Naive CD4 cell counts	Central memory CD4 cell counts	Effector memory CD4 cell counts
UCL WT	5	2.57288e+06	14980.7	42669.7
UCL WT	5	1.19006e+06	9523.53	25716.3
UCL WT	8	2.52743e+06	22992.1	52893
UCL WT	10	2.24656e+06	16043.7	38433.9
UCL WT	10	2.73032e+06	16477.3	49857.1
UCL WT	10	3.12174e+06	24649.1	79355.4
UCL WT	14	2.8316e+06	20088.3	98062.4
UCL WT	15	7.66246e+06	75842.1	392272
UCL WT	15	1.0775e+07	79387	385352
UCL WT	16	1.05046e+07	106576	309093
UCL WT	27	1.31528e+07	157002	873011
UCL WT	28	1.07455e+07	131367	642866
UCL WT	28	1.54822e+07	177990	772815
UCL WT	28	1.70849e+07	255474	917006
UCL WT	42	1.39604e+07	155027	729562
UCL WT	42	1.43909e+07	106922	898545
UCL WT	43	2.07014e+07	184464	1.17927e+06
UCL WT	43	2.22027e+07	213985	1.64628e+06
UCL WT	51	2.06698e+07	190529	1.50414e+06
UCL WT	51	2.09362e+07	205286	1.62845e+06
UCL WT	56	1.15402e+07	142293	830112
UCL WT	56	1.07427e+07	141570	797305
UCL WT	57	1.23076e+07	135949	1.14925e+06
UCL WT	70	1.78354e+07	174561	1.38624e+06
UCL WT	70	2.3735e+07	184280	2.05837e+06
UCL WT	77	1.55181e+07	306135	2.04416e+06
UCL WT	79	1.68439e+07	128834	1.27559e+06
UCL WT	99	1.9621e+07	499543	2.07563e+06

## Sheet: GF, NIMR, UCL, Oxford mice cell
Location and mouse type	Mouse age (days)	Central memory CD4 cell counts	Effector memory CD4 cell counts	Central memory CD4 Ki67 expression	Effector memory CD4 Ki67 expression	Remarks
NIMR chimera	70	399000	1790000
NIMR chimera	70	581000	2550000
NIMR chimera	70	682000	3010000
NIMR chimera	70	779000	3470000
NIMR chimera	84	859000	4730000
NIMR chimera	84	1430000	9270000
NIMR chimera	84	814000	6760000
NIMR chimera	84	562000	4110000
NIMR chimera	98	1450000	6110000
NIMR chimera	98	1540000	7020000
NIMR chimera	98	929000	5800000
NIMR chimera	98	825000	3670000
NIMR chimera	119	768000	4480000
NIMR chimera	119	679000	3430000
NIMR chimera	119	817000	6700000
NIMR chimera	119	707000	4620000
NIMR chimera	140	491000	4710000
NIMR chimera	140	899000	8670000
NIMR chimera	140	628000	8300000
NIMR chimera	140	733000	8080000
NIMR chimera	168	1130000	10900000
NIMR chimera	168	878000	12000000
NIMR chimera	168	1030000	14400000
NIMR chimera	168	609000	10100000
NIMR chimera	196	1790000	13700000
NIMR chimera	196	1080000	10100000
NIMR chimera	196	1420000	11500000
NIMR chimera	196	1930000	18900000
NIMR chimera	119		2580000		21.5
NIMR chimera	119		3000000		26.5
NIMR chimera	119		2820000		27.2
NIMR chimera	119		2880000		22.9
NIMR chimera	119		2920000		22.7
NIMR chimera	189		2970000		14.1
NIMR chimera	189		3550000		13.5
NIMR chimera	189		1680000		15
NIMR chimera	189		1690000		17.1
NIMR chimera	189		3630000		17.3
NIMR chimera	112		3180000		21.7
NIMR chimera	112		2300000		22.5
NIMR chimera	112		1550000		19.9
NIMR chimera	112		2900000		17
NIMR chimera	140		3140000		27.2
NIMR chimera	140		8370000		27.2
NIMR chimera	140		1840000		25.5
NIMR chimera	140		5370000		26.3
NIMR WT	70		1810000
NIMR WT	70		4230000		27.8
NIMR WT	70		2470000		42.3
NIMR WT	91		4070000
NIMR WT	119		6140000
NIMR WT	119		3780000		31.8
NIMR WT	154		2520000
NIMR WT	147		7280000
NIMR WT	168		5910000		37.8
NIMR WT	161		6240000
NIMR WT	56		4100000
UCL chimera	114	424000	2990000
UCL chimera	114	353000	2580000
UCL chimera	114	175000	2100000
UCL chimera	114	185000	1950000
UCL chimera	163	223000	1820000	47.7	38.3
UCL chimera	118	171000	1640000	50.5	35.7
UCL chimera	199	203000	4760000	43.8	26.8
UCL chimera	158	217000	3510000	47.8	28.8
UCL chimera	174	207000	2430000	41.5	32.3
UCL chimera	122	315000	1350000	36.8	33.4
UCL chimera	177	225000	1250000	41.3	28.3
UCL chimera	155	196000	1370000	34.7	24
UCL chimera	90	399000	1760000	29.8	29.5
UCL chimera	90	280000	1350000	32.9	32.1
UCL chimera	90	211000	942000	32.6	30.8
UCL chimera	98	333000	2670000	32.3	28.6
UCL chimera	98	262000	1840000	40.8	29.4
UCL chimera	102	283000	2050000	32.6	30.7
UCL chimera	116	281000	1450000	38.8	28.3
UCL chimera	112	327000	2390000	34.7	31.7
UCL chimera	112	213000	1390000	37.1	26.1
UCL chimera	170	497000	3510000	36	21.1
UCL chimera	170	457000	5070000	36.7	20.3
UCL chimera	170	228000	2310000	41.4	19.8
UCL chimera	170	191000	2920000	33.1	20.4
UCL chimera	170	298000	2140000	39.1	22.1
UCL chimera	170	351000	4520000	35.5	21.7
UCL chimera	170	333000	2950000	40.4	21.7
UCL chimera	169	255000	2420000	30.5	26
UCL chimera	170	292000	4110000	37.5	27.7
UCL chimera	170	204000	2380000	38	22.9
UCL chimera	170	287000	4290000	39.6	24.9
UCL chimera	137	483000	2200000	44.6	31.7
UCL chimera	137	913000	2700000	49.8	33.8
UCL chimera	137	474000	2270000	44.5	31.9
UCL chimera	133	702000	3350000	27.4	20
UCL chimera	133	366000	1590000	28.1	22
UCL chimera	149	487000	1710000	28.1	20.6
UCL chimera	91	343000	1430000	51.3	41.8
UCL chimera	75	365000	1430000	44.6	39.4
UCL chimera	66	235000	1580000	51.8	39.7
UCL chimera	102	418000	2260000	39.6	24.9
UCL chimera	87	505000	1990000	41.4	28.7
UCL chimera	78	382000	1740000	39.9	32
UCL chimera	116	566000	2480000	45.5	34.8
UCL chimera	101	554000	1870000	44.6	35.2
UCL chimera	92	482000	1910000	46.2	37.5
UCL chimera	192	389000	2430000	32	18.6
UCL chimera	192	438000	2340000	29.5	19.2
UCL chimera	151	267000	1970000	47.09	20.72
UCL chimera	150	244000	1730000	41.8	15.01
UCL chimera	150	359000	2350000	44.62	19.94
UCL chimera	151	321000	3340000	40.62	23.58
UCL chimera	150	234000	1820000	39.78	20.81
UCL chimera	154	291000	2440000	43.43	25.16
UCL chimera	154	293000	2430000	40.73	21.01
UCL chimera	154	318000	2400000	34.26	16.87
UCL chimera	150	273000	1690000	40.53	18.68
UCL chimera	151	346000	2240000	41.33	17.58
UCL chimera	150	211000	1920000	43.11	20.87
UCL chimera	150	261000	2470000	40	19.32
UCL chimera	150	328000	3180000	35.54	18.45
UCL chimera	150	422000	3010000	47.18	24.41
UCL chimera	150	262000	2000000	38.3	17.82
UCL chimera	172	378000	2320000	36.56	17.08
UCL chimera	172	285000	2610000	46.11	25.65
UCL chimera	175	228000	2070000	37.6	16.16
UCL chimera	175	218000	2460000	36.96	16.6
UCL chimera	172	208000	1860000	33.44	13.97
UCL chimera	171	183000	1830000	33.15	15.02
UCL chimera	172	354000	2140000	44.85	24.69
UCL chimera	172	331000	2480000	51.18	24.82
UCL chimera	171	370000	2710000	46.23	26.26
UCL chimera	172	399000	2820000	37.1	17.92
UCL chimera	171	575000	6290000	41.25	20.76
UCL chimera	171	534000	3190000	44.43	22.41
UCL chimera	171	478000	3180000	35.33	14.22
UCL chimera	171	228000	2720000	38.97	17.59
UCL WT	70	175000	1390000	67.3	44.1
UCL WT	70	184000	2060000	74.3	53.4
UCL WT	51	229000	1700000	75.8	52.7
UCL WT	51	190000	1620000	69.9	54
UCL WT	43	146000	983000	76.9	59.6
UCL WT	43	229000	1660000	75.9	62.2
UCL WT	151	192000	1330000	41.6	34.4
UCL WT	151	229000	1790000	44.6	33.2
UCL WT	56	142000	830000	66.3	50.8
UCL WT	56	142000	797000	61.2	51.8
UCL WT	42	155000	730000	67.1	60.8
UCL WT	42	107000	899000	69.7	56.4
UCL WT	28	131000	643000	65.9	65.9	Data not used in Fig 7
UCL WT	28	178000	773000	75.7	71.2	Data not used in Fig 7
UCL WT	5	15000	42700	85.8	84.5	Data not used in Fig 7
UCL WT	10	16000	38400	69.6	63.2	Data not used in Fig 7
UCL WT	10	16500	49900	69.8	69.5	Data not used in Fig 7
UCL WT	10	24600	79400	55.1	52.1	Data not used in Fig 7
UCL WT	15	75800	392000	77.6	64.6	Data not used in Fig 7
UCL WT	15	79400	385000	69.8	50.6	Data not used in Fig 7
UCL WT	79	129000	1280000	41.2	31.4
UCL WT	174	139000	2210000	35	26.1
UCL WT	57	136000	1150000	57.2	38.8
UCL WT	27	157000	873000	69.1	55.6	Data not used in Fig 7
UCL WT	14	20100	98100	82.4	71	Data not used in Fig 7
UCL WT	8	23000	52900	80.1	75.5	Data not used in Fig 7
UCL WT	99	500000	2080000	55.7	61.8
UCL WT	77	306000	2040000	62.4	55.4
UCL WT	28	255000	917000	77.7	83.1	Data not used in Fig 7
UCL WT	16	107000	309000	93.5	89.7	Data not used in Fig 7
UCL WT	5	9520	25700	99.3	99.6	Data not used in Fig 7
UCL WT	98			48.61	32.37
UCL WT	98			49.74	28.67
UCL WT	98			48.2	29.12
UCL WT	98			47.14	31.22
UCL WT	98			52.81	36.45
UCL WT	98			54.88	27.92
UCL WT	98			40.91	29.53
UCL WT	98			44.96	29.49
UCL WT	98			48.78	30.89
UCL WT	98			51.12	29.27
UCL WT	112			56.97	35.57
UCL WT	112			49.84	31.73
UCL WT	112			47.5	28.37
UCL WT	112			48.21	32.88
UCL WT	112			38.43	27.42
UCL WT	112			37.99	31.87
UCL WT	112			36.05	30.84
UCL WT	112			38	26.36
UCL WT	112			41.36	31.98
UCL WT	112			45.28	31.83
UCL WT	112			43.47	30.93
UCL WT	112			37.49	27.46
UCL WT	112			37.13	27.54
UCL WT	112			42.07	32.87
UCL WT	112			46.2	33.59
UCL WT	112			47.77	30.5
UCL WT	112			48.46	34.85
UCL WT	112			40.79	24.94
UCL WT	98			42.62	31.09
UCL WT	98			39.65	30.63
UCL WT	98			46.12	35.79
UCL WT	98			43.62	30.2
UCL WT	98			41.59	34.36
UCL WT	98			39.58	34.01
UCL WT	98			48.29	40.45
UCL WT	98			47.95	38.25
UCL WT	98			43.19	33.11
UCL WT	98			47.12	38.42
UCL WT	98			48.54	36.11
UCL WT	98			45.87	37.5
UCL WT	98			39.69	33.11
UCL WT	98			45.74	36.04
UCL WT	112	249000	1450000	52.85	31.35
UCL WT	112	310000	1710000	50.47	29.9
UCL WT	112	504000	2630000	59.88	31.38
UCL WT	112	193000	1060000	59.39	30.57
UCL WT	112	495000	2430000	48.99	29.92
UCL WT	112	279000	2050000	56.92	34.95
UCL WT	112	319000	3030000	52.63	34.34
UCL WT	112	276000	2260000	48.27	33.84
UCL WT	112	269000	2020000	46.37	27.93
UCL WT	112	375000	2890000	48.7	35.73
UCL WT	112	509000	3280000	47.38	31.09
UCL WT	112	464000	2790000	49.13	33.69
UCL WT	112	354000	2780000	42.03	27.24
UCL WT	112	267000	2510000	42.81	29.88
UCL WT	84	270000	1730000	58.04	32.88
UCL WT	84	185000	1980000	55.64	32.43
UCL WT	84	232000	1710000	62.45	35.65
UCL WT	84	228000	1760000	53.14	34.61
UCL WT	84	182000	1910000	49.5	29.66
UCL WT	84	226000	1780000	56.09	32.01
UCL WT	84	285000	1760000	47.58	24.97
UCL WT	84	240000	1890000	54.06	32.61
UCL WT	84	231000	1810000	51.78	33.85
UCL WT	84	217000	1840000	53.19	31.37
UCL WT	84	165000	1730000	51.38	30.89
UCL WT	84	182000	1440000	47.19	30.76
UCL WT	84	302000	1880000	50.8	33.43
UCL WT	84	265000	2270000	51.17	34.88
UCL WT	84	214000	1350000	53.49	29.15
UCL WT	84	237000	1860000	49.33	29.79
UCL WT	84	211000	1810000	46.88	29.2
UCL WT	84	154000	1610000	40.11	28.03
UCL WT	84	225000	1220000	46.03	26.59
UCL WT	84	316000	2110000	38.95	19.2
UCL WT	84	236000	1700000	46.72	25.78
UCL WT	84	234000	1670000	49.47	25.3
UCL WT	84	218000	1400000	53.32	22.4
UCL WT	84	254000	1320000	59.72	29.36
UCL WT	84	326000	1590000	53	28.27
UCL WT	84	375000	1940000	53.25	26.91
UCL WT	84	246000	1740000	58.32	32.01
UCL WT	84	462000	2800000	50.26	30.94
UCL WT	84	160000	1530000	45.68	19.2
UCL WT	84	250000	1820000	48.71	22.68
UCL WT	84	320000	1790000	54.82	28.28
UCL WT	84	422000	2340000	48.29	26.94
UCL WT	129	153000	1750000	49.8	40.8
UCL WT	171	233000	3890000	39.2	33.2
UCL WT	146	276000	1530000	35.6	36
UCL WT	85	220000	1150000	53.3	37.5
UCL WT	74	157000	1440000	41.4	30.2
UCL WT	89	263000	1730000	40.5	31.1
UCL WT	103	147000	1410000	36.8	25.3
UCL WT	124	267000	1410000	44.6	39.6
UCL WT	145	298000	1810000	31.5	29.3
UCL WT	99	300000	1210000	37	35.8
UCL WT	161	197000	2300000	37.8	28.1
UCL WT	161	200000	3830000	35.5	27.7
UCL WT	161	238000	2810000	40.2	28.1
UCL WT	161	268000	4530000	37.1	22.2
UCL WT	161	242000	2530000	33	19.9
UCL WT	161	301000	2650000	35.4	21.8
UCL WT	161	336000	2750000	39	26.2
UCL WT	161	354000	3140000	33	23.4
UCL WT	161	179000	3130000	29.7	21.5
UCL WT	161	232000	2560000	36.1	28.1
UCL WT	161	222000	2690000	41.4	29.6
UCL WT	78	277000	1060000	37.1	35.7
UCL WT	92	390000	2050000	49.7	39.9
UCL WT	104	248000	1040000	38.3	24.9
UCL WT	118	297000	1770000	35.2	30.8
UCL WT	140	716000	2990000	36.2	26.2
UCL WT	140	528000	2450000	40.2	32
UCL WT	140	458000	2020000	37.2	32.6
UCL WT	42	283000	1010000	52.1	37.8
UCL WT	42	309000	1320000	47.1	35.2
UCL WT	42	278000	1020000	45.8	28.3
UCL WT	105	437000	1800000	41.1	37.9
UCL WT	105	556000	2570000	40.6	33.4
UCL WT	133	187000	2010000	39.1	24.4
UCL WT	133	197000	2140000	32.4	28.8
Oxford GF	42	105000	471000	38.3	30.7
Oxford GF	42	71400	286000	49.4	37.5
Oxford GF	42	112000	507000	47.2	30.3
Oxford GF	70	30000	141000			Data not used in Fig 7
Oxford GF	70	40900	146000			Data not used in Fig 7
Oxford GF	70	66000	302000			Data not used in Fig 7
Oxford GF	70	51900	207000			Data not used in Fig 7
Oxford GF	70	49600	165000			Data not used in Fig 7
Oxford GF	84	235000	1210000			Data not used in Fig 7
Oxford GF	84	229000	1080000			Data not used in Fig 7
Oxford GF	84	190000	946000			Data not used in Fig 7
Oxford GF	84	188000	985000			Data not used in Fig 7
Oxford GF	145	256000	1420000	52.8	53.6
Oxford GF	145	281000	1420000	51	51.9
Oxford GF	71	352000	1210000	56.9	60
Oxford GF	71	328000	1140000	61.7	60.8
Oxford GF	184	111000	1090000	31.2	33.9
Oxford GF	184	93100	785000	31.9	39
Oxford GF	184	102000	1090000	30.8	31
Oxford GF	184	176000	2060000	25.5	28.7
Oxford GF	184	115000	878000	23.2	31.6
Oxford GF	184	89900	1200000	25.4	34.1
Oxford GF	184	81700	674000	31.1	30.8
Oxford SPF	145	289000	1780000	30.8	41.3
Oxford SPF	145	455000	2670000	31.2	41.3
Oxford SPF	71	309000	1150000	58.8	57.2
Oxford SPF	71	477000	1710000	45.2	47

## Sheet: WT and chimera cell counts for 
Location and mouse type	Mouse age (days)	Naive CD4 cell counts	Central memory CD4 cell counts
NIMR chimera	84	35859000	859150
NIMR chimera	84	37163000	562100
NIMR chimera	98	47790000	1451300
NIMR chimera	98	48550000	1539800
NIMR chimera	98	36520000	929400
NIMR chimera	98	31050000	825300
NIMR chimera	119	29550000	768200
NIMR chimera	119	24160000	678700
NIMR chimera	119	32520000	816900
NIMR chimera	119	30562000	706500
NIMR chimera	140	18390000	490600
NIMR chimera	140	31610000	899000
NIMR chimera	140	25300000	628300
NIMR chimera	140	29940000	733100
NIMR chimera	168	38220000	1127200
NIMR chimera	168	45170000	877800
NIMR chimera	168	33060000	1031100
NIMR chimera	168	21130000	608500
NIMR chimera	196	27080000	1415600
NIMR chimera	196	46430000	1930400
NIMR chimera	259	13360000	476400
NIMR chimera	259	10330000	291400
NIMR chimera	259	14190000	317400
NIMR chimera	259	13350000	398600
NIMR chimera	420	2670000	309200
NIMR chimera	420	5223000	538000
NIMR chimera	420	4793000	300800
NIMR chimera	70	15200000	399000
NIMR chimera	70	26990000	581000
NIMR chimera	70	26800000	682000
NIMR chimera	70	27900000	779000
NIMR chimera	84	62240200	1428155
NIMR chimera	84	43504780	814175
NIMR chimera	196	38507430	1787209
NIMR chimera	196	30700996	1076000
NIMR chimera	420	6123380	473896
NIMR chimera	119	20150000
NIMR chimera	119	24190000
NIMR chimera	119	22890000
NIMR chimera	119	18800000
NIMR chimera	119	20550000
NIMR chimera	189	13074000
NIMR chimera	189	16950000
NIMR chimera	189	9746000
NIMR chimera	189	9636000
NIMR chimera	189	18180000
NIMR chimera	112	24080000
NIMR chimera	112	19540000
NIMR chimera	112	14700000
NIMR chimera	112	25340000
NIMR chimera	217	14380000
NIMR chimera	217	17270000
NIMR chimera	217	16610000
NIMR chimera	217	17224000
NIMR chimera	140	20500000
NIMR chimera	140	47070000
NIMR chimera	140	11180000
NIMR chimera	140	29080000
NIMR chimera	224	23102000
NIMR chimera	224	11304000
NIMR chimera	224	16170000
NIMR chimera	315	9046000
NIMR chimera	315	7672000
NIMR chimera	315	9853000
NIMR chimera	364	3468000
NIMR chimera	371	7294000
NIMR chimera	371	8029000
NIMR chimera	392	6085000
NIMR chimera	392	7460000
NIMR chimera	392	4551000
NIMR chimera	392	9214000
UCL chimera	114	1.9709e+07	423820
UCL chimera	114	2.05862e+07	353112
UCL chimera	114	1.5185e+07	174801
UCL chimera	114	1.77619e+07	184658
UCL chimera	218	2.19736e+07	315290
UCL chimera	163	1.67286e+07	223343
UCL chimera	118	1.70107e+07	171083
UCL chimera	260	2.63147e+07	482882
UCL chimera	213	4.64962e+07	575246
UCL chimera	199	2.14025e+07	202586
UCL chimera	158	1.72331e+07	217286
UCL chimera	302	9.33255e+06	211364
UCL chimera	255	6.6565e+06	131008
UCL chimera	241	9.21783e+06	181254
UCL chimera	200	1.49887e+07	263301
UCL chimera	202	9.96491e+06	188071
UCL chimera	174	1.32499e+07	206931
UCL chimera	122	1.91343e+07	315330
UCL chimera	207	1.36512e+07	286360
UCL chimera	177	1.00458e+07	225418
UCL chimera	155	1.1773e+07	195811
UCL chimera	305	1.19649e+07	337299
UCL chimera	282	9.80077e+06	232634
UCL chimera	98	1.58211e+07	333246
UCL chimera	102	1.86124e+07	283118
UCL chimera	116	1.75328e+07	281204
UCL chimera	112	1.9407e+07	327208
UCL chimera	112	1.39996e+07	213198
UCL chimera	304	6.76274e+06	183200
UCL chimera	304	8.2029e+06	175422
UCL chimera	327	1.34424e+07	315311
UCL chimera	327	7.81605e+06	107830
UCL chimera	326	6.82042e+06	215040
UCL chimera	326	7.66976e+06	252207
UCL chimera	326	8.19769e+06	219518
UCL chimera	326	1.31041e+07	334649
UCL chimera	304	1.23477e+07	324631
UCL chimera	304	1.38676e+07	339910
UCL chimera	304	1.37291e+07	294982
UCL chimera	304	1.46443e+07	353646
UCL chimera	312	1.25019e+07	253471
UCL chimera	326	1.80347e+07	751491
UCL chimera	318	1.18483e+07	434844
UCL chimera	340	1.41658e+07	454550
UCL chimera	318	1.7997e+07	499419
UCL chimera	341	1.20236e+07	414317
UCL chimera	341	1.06322e+07	376053
UCL chimera	340	1.40393e+07	363847
UCL chimera	327	1.46811e+07	385056
UCL chimera	337	1.07452e+07	362370
UCL chimera	338	1.38211e+07	429492
UCL chimera	318	1.14007e+07	348567
UCL chimera	318	1.2055e+07	381803
UCL chimera	318	8.5143e+06	237887
UCL chimera	318	1.49916e+07	344083
UCL chimera	170	2.22096e+07	496984
UCL chimera	170	2.54164e+07	457297
UCL chimera	170	1.42164e+07	228314
UCL chimera	170	1.24022e+07	190736
UCL chimera	170	1.64071e+07	298133
UCL chimera	170	2.60997e+07	350913
UCL chimera	170	1.79329e+07	333335
UCL chimera	169	1.22769e+07	254729
UCL chimera	170	1.19224e+07	292260
UCL chimera	170	1.39982e+07	203601
UCL chimera	170	1.37203e+07	286536
UCL chimera	137	2.59186e+07	482752
UCL chimera	137	2.23223e+07	913094
UCL chimera	137	2.90196e+07	473525
UCL chimera	133	2.27416e+07	702159
UCL chimera	133	1.65511e+07	365735
UCL chimera	149	1.37203e+07	486633
UCL chimera	347	6.82065e+06	242831
UCL chimera	319	9.20985e+06	287703
UCL chimera	266	8.26008e+06	197486
UCL chimera	266	9.19582e+06	273037
UCL chimera	102	2.35483e+07	418185
UCL chimera	87	2.25935e+07	505105
UCL chimera	78	2.47473e+07	381678
UCL chimera	116	2.49648e+07	565743
UCL chimera	101	2.61335e+07	553656
UCL chimera	92	2.52778e+07	482094
UCL chimera	442	2.53962e+06	218981
UCL chimera	382	7.62781e+06	338701
UCL chimera	330	9.01613e+06	287970
UCL chimera	192	1.58176e+07	389444
UCL chimera	192	1.54133e+07	438048
UCL chimera	273	8.77912e+06	276584
UCL chimera	302	9.18619e+06	290343
UCL chimera	90	1.71312e+07	398621
UCL chimera	90	1.55807e+07	280149
UCL chimera	90	1.4335e+07	210833
UCL chimera	98	1.61964e+07	261806
UCL chimera	91	2.25708e+07	343216
UCL chimera	75	2.33638e+07	364616
UCL chimera	66	2.29704e+07	235384
UCL chimera	330	8.09292e+06	274220
UCL chimera	151	1.47792e+07	266850
UCL chimera	150	1.77676e+07	244313
UCL chimera	150	2.30042e+07	359190
UCL chimera	151	1.86475e+07	320623
UCL chimera	150	1.74052e+07	234238
UCL chimera	154	1.78962e+07	290814
UCL chimera	154	2.00262e+07	293133
UCL chimera	154	1.83562e+07	317548
UCL chimera	150	1.87355e+07	272833
UCL chimera	151	1.94118e+07	346190
UCL chimera	150	1.93202e+07	210572
UCL chimera	150	1.66684e+07	261090
UCL chimera	150	1.94869e+07	328348
UCL chimera	150	2.43593e+07	421819
UCL chimera	150	2.3713e+07	261899
UCL chimera	172	1.63673e+07	377991
UCL chimera	172	2.08535e+07	285013
UCL chimera	175	1.58259e+07	227664
UCL chimera	175	1.83782e+07	218197
UCL chimera	172	1.15743e+07	208413
UCL chimera	171	1.28726e+07	182902
UCL chimera	172	1.51921e+07	354093
UCL chimera	172	1.6217e+07	331301
UCL chimera	171	1.62753e+07	369943
UCL chimera	172	1.67664e+07	399014
UCL chimera	171	2.43394e+07	575337
UCL chimera	171	2.12667e+07	533911
UCL chimera	171	2.15715e+07	478056
UCL chimera	171	8.28358e+06	227919
UCL WT	70	1.78354e+07	174561
UCL WT	70	2.3735e+07	184280
UCL WT	51	2.65758e+07	229082
UCL WT	51	2.23788e+07	190230
UCL WT	43	1.47955e+07	145911
UCL WT	43	2.07601e+07	229041
UCL WT	273	9.17564e+06	198863
UCL WT	273	9.95978e+06	255042
UCL WT	151	1.23874e+07	192221
UCL WT	151	1.02125e+07	228752
UCL WT	56	1.15402e+07	142293
UCL WT	56	1.07427e+07	141570
UCL WT	42	1.39604e+07	155027
UCL WT	42	1.43909e+07	106922
UCL WT	79	1.68439e+07	128834
UCL WT	296	7.96004e+06	202064
UCL WT	174	1.30028e+07	139152
UCL WT	57	1.23076e+07	135949
UCL WT	99	1.9621e+07	499543
UCL WT	77	1.55181e+07	306135
NIMR WT	70	18310000
NIMR WT	70	36600000
NIMR WT	70	16090000
NIMR WT	224	14060000
NIMR WT	91	20200000
NIMR WT	119	13700000
NIMR WT	119	16360000
NIMR WT	154	13000000
NIMR WT	147	11100000
NIMR WT	168	20120000
NIMR WT	490	11160000
NIMR WT	161	25800000
NIMR WT	364	11570000
NIMR WT	56	31000000
NIMR WT	224	12260000
NIMR WT	224	11950000
NIMR WT	224	10460000
NIMR WT	252	1.25914e+07
NIMR WT	252	1.52616e+07
NIMR WT	252	1.7448e+07
NIMR WT	252	9.7143e+06
NIMR WT	252	1.31924e+07
NIMR WT	252	1.88341e+07
NIMR WT	252	9.81108e+06
NIMR WT	252	1.0534e+07
NIMR WT	252	6.95105e+06
NIMR WT	252	9.43351e+06
NIMR WT	252	1.28541e+07
NIMR WT	252	7.32701e+06
NIMR WT	252	1.21641e+07
NIMR WT	252	1.32164e+07
UCL WT	98	2.2963e+07
UCL WT	98	2.84214e+07
UCL WT	98	2.71831e+07
UCL WT	98	2.88747e+07
UCL WT	98	2.87269e+07
UCL WT	98	2.00056e+07
UCL WT	98	2.37783e+07
UCL WT	98	2.9291e+07
UCL WT	98	2.23633e+07
UCL WT	98	2.33431e+07
UCL WT	98	1.27262e+07
UCL WT	98	2.41686e+07
UCL WT	98	3.18163e+07
UCL WT	98	2.999e+07
UCL WT	98	2.08858e+07
UCL WT	98	2.53124e+07
UCL WT	98	2.40031e+07
UCL WT	98	2.10157e+07
UCL WT	98	1.46785e+07
UCL WT	98	9.83771e+06
UCL WT	98	2.35477e+07
UCL WT	98	2.2848e+07
UCL WT	98	2.2474e+07
UCL WT	98	2.93108e+07
UCL WT	112	1.93612e+07	248758
UCL WT	112	1.70313e+07	309515
UCL WT	112	2.31322e+07	504200
UCL WT	112	1.45173e+07	193477
UCL WT	112	2.20108e+07	495216
UCL WT	112	2.26988e+07	279222
UCL WT	112	2.24297e+07	319467
UCL WT	112	2.32911e+07	276198
UCL WT	112	1.82884e+07	269062
UCL WT	112	2.33752e+07	374869
UCL WT	112	2.43337e+07	508610
UCL WT	112	2.12625e+07	464068
UCL WT	112	3.02536e+07	353814
UCL WT	112	2.26348e+07	267406
UCL WT	84	1.75699e+07	269698
UCL WT	84	1.59922e+07	185401
UCL WT	84	2.21367e+07	231835
UCL WT	84	2.13956e+07	227506
UCL WT	84	1.6189e+07	182413
UCL WT	84	2.07179e+07	225935
UCL WT	84	1.86095e+07	285135
UCL WT	84	1.72122e+07	239880
UCL WT	84	2.13074e+07	230726
UCL WT	84	1.71628e+07	217349
UCL WT	84	1.77482e+07	164948
UCL WT	84	1.49904e+07	182183
UCL WT	84	1.66266e+07	301830
UCL WT	84	1.66833e+07	264835
UCL WT	84	2.01592e+07	214219
UCL WT	84	1.96737e+07	237037
UCL WT	84	1.72854e+07	211385
UCL WT	84	1.06644e+07	153997
UCL WT	84	1.49893e+07	225393
UCL WT	84	2.2443e+07	316403
UCL WT	84	1.70716e+07	235878
UCL WT	84	2.27914e+07	234148
UCL WT	84	1.58267e+07	217776
UCL WT	84	1.44418e+07	253910
UCL WT	84	1.86266e+07	325536
UCL WT	84	1.91007e+07	375138
UCL WT	84	1.59748e+07	245636
UCL WT	84	2.43557e+07	461712
UCL WT	84	1.11596e+07	159742
UCL WT	84	1.69452e+07	250091
UCL WT	84	1.73777e+07	319826
UCL WT	84	1.94606e+07	422215
UCL WT	129	1.16991e+07	152979
UCL WT	171	9.10083e+06	233019
UCL WT	213	9.34191e+06	245715
UCL WT	146	1.36127e+07	275820
UCL WT	85	1.19934e+07	219864
UCL WT	74	1.38831e+07	156723
UCL WT	89	1.61969e+07	263490
UCL WT	103	9.55396e+06	146619
UCL WT	124	1.54636e+07	266760
UCL WT	145	1.22276e+07	297508
UCL WT	99	1.50383e+07	300103
UCL WT	161	1.21143e+07	196723
UCL WT	161	1.25308e+07	200192
UCL WT	161	1.1539e+07	238433
UCL WT	161	8.33339e+06	268135
UCL WT	161	8.23726e+06	241914
UCL WT	161	1.44332e+07	301009
UCL WT	161	1.35638e+07	335838
UCL WT	161	2.37853e+07	353742
UCL WT	161	1.02257e+07	179027
UCL WT	161	1.29344e+07	232043
UCL WT	161	1.33472e+07	221674
UCL WT	78	1.42253e+07	277162
UCL WT	92	2.07451e+07	390387
UCL WT	104	1.1851e+07	248280
UCL WT	118	1.48631e+07	297389
UCL WT	140	2.32868e+07	715701
UCL WT	140	1.9098e+07	528217
UCL WT	140	1.90377e+07	457943
UCL WT	488	5.11677e+06	225534
UCL WT	488	1.88652e+06	173371
UCL WT	488	1.69214e+06	224797
UCL WT	42	1.92497e+07	283192
UCL WT	42	2.50922e+07	309284
UCL WT	42	2.16454e+07	277676
UCL WT	105	1.95093e+07	437009
UCL WT	105	1.53241e+07	556255
UCL WT	133	8.91608e+06	186517
UCL WT	133	6.38689e+06	197489

## Sheet: Data used for fitting spline to
Location and mouse type	Days post BMT	Normalised chimerism in naive CD4	Normalised chimerism in central memory CD4
NIMR chimera	28	0.0493675	0.0056004
NIMR chimera	28	0.0774029	0.0227084
NIMR chimera	42	0.261873	0.0803017
NIMR chimera	42	0.138586	0.0334484
NIMR chimera	42	0.199105	0.0411356
NIMR chimera	42	0.256003	0.0658652
NIMR chimera	63	0.420968	0.121442
NIMR chimera	63	0.500068	0.203354
NIMR chimera	63	0.544726	0.27181
NIMR chimera	63	0.890139	0.225556
NIMR chimera	84	0.598882	0.233435
NIMR chimera	84	0.671138	0.239363
NIMR chimera	84	0.669397	0.303465
NIMR chimera	84	0.57259	0.204901
NIMR chimera	112	0.646592	0.315816
NIMR chimera	112	0.768245	0.378444
NIMR chimera	112	0.759898	0.404642
NIMR chimera	112	0.764106	0.436686
NIMR chimera	140	0.747165	0.329483
NIMR chimera	140	0.839841	0.434259
NIMR chimera	203	0.676115	0.345662
NIMR chimera	203	0.964516	0.520551
NIMR chimera	203	0.956366	0.607925
NIMR chimera	203	0.729856	0.391865
NIMR chimera	364	0.779535	0.376779
NIMR chimera	364	0.767294	0.522213
NIMR chimera	364	0.964884	0.689234
NIMR chimera	56	0.547424
NIMR chimera	56	0.594986
NIMR chimera	56	0.516796
NIMR chimera	56	0.532884
NIMR chimera	56	0.45686
NIMR chimera	126	0.846637
NIMR chimera	126	0.788103
NIMR chimera	126	0.835537
NIMR chimera	126	0.830349
NIMR chimera	126	0.746015
NIMR chimera	56	0.580524
NIMR chimera	56	0.476937
NIMR chimera	56	0.619219
NIMR chimera	56	0.55061
NIMR chimera	140	0.789549
NIMR chimera	140	0.89003
NIMR chimera	140	0.825215
NIMR chimera	140	0.848384
NIMR chimera	63	0.640519
NIMR chimera	63	0.584001
NIMR chimera	63	0.549454
NIMR chimera	63	0.534196
NIMR chimera	168	0.918305
NIMR chimera	168	0.926165
NIMR chimera	168	0.800965
NIMR chimera	259	0.894669
NIMR chimera	259	0.733711
NIMR chimera	259	0.859552
NIMR chimera	287	0.729291
NIMR chimera	294	0.761986
NIMR chimera	294	0.818273
NIMR chimera	315	0.927361
NIMR chimera	315	0.929169
NIMR chimera	315	0.920847
NIMR chimera	315	0.936354
UCL chimera	53	0.572379	0.241765
UCL chimera	53	0.680177	0.361717
UCL chimera	53	0.595779	0.259618
UCL chimera	53	0.678927	0.372818
UCL chimera	56	0.679601	0.421755
UCL chimera	56	0.704503	0.487594
UCL chimera	56	0.793797	0.466707
UCL chimera	98	0.7802	0.635095
UCL chimera	98	0.839993	0.680252
UCL chimera	98	0.857476	0.746004
UCL chimera	98	0.90963	0.688565
UCL chimera	140	0.865053	0.712425
UCL chimera	140	0.972815	0.757971
UCL chimera	140	0.948001	0.793717
UCL chimera	140	0.936792	0.78878
UCL chimera	56	0.816252	0.428395
UCL chimera	56	0.572535	0.357774
UCL chimera	56	0.492298	0.288719
UCL chimera	89	0.737233	0.482563
UCL chimera	89	0.778455	0.548256
UCL chimera	89	0.824441	0.550571
UCL chimera	224	0.956435	0.851901
UCL chimera	224	0.938089	0.846543
UCL chimera	26	0.11022	0.0467541
UCL chimera	26	0.0945115	0.0573795
UCL chimera	40	0.454045	0.224055
UCL chimera	40	0.398998	0.144749
UCL chimera	40	0.361755	0.124688
UCL chimera	246	0.93235	0.847501
UCL chimera	246	0.990347	0.950307
UCL chimera	246	0.926564	0.821261
UCL chimera	246	0.971841	0.872241
UCL chimera	246	0.975921	0.905709
UCL chimera	246	0.939135	0.819602
UCL chimera	246	0.935913	0.836837
UCL chimera	246	0.954485	0.874419
UCL chimera	246	0.94144	0.86979
UCL chimera	246	0.971135	0.898672
UCL chimera	246	0.963362	0.881178
UCL chimera	246	0.870073	0.829935
UCL chimera	246	0.947878	0.869614
UCL chimera	260	0.939344	0.824795
UCL chimera	260	0.927635	0.836554
UCL chimera	260	0.924409	0.785415
UCL chimera	260	0.965848	0.833278
UCL chimera	260	0.978483	0.866969
UCL chimera	260	0.859814	0.822885
UCL chimera	260	1.02732	0.936163
UCL chimera	260	0.932326	0.819897
UCL chimera	260	0.908672	0.763709
UCL chimera	260	0.898768	0.710188
UCL chimera	260	0.94119	0.814508
UCL chimera	260	0.981751	0.822914
UCL chimera	260	0.892371	0.844974
UCL chimera	260	0.995723	0.877992
UCL chimera	95	0.864108	0.678497
UCL chimera	95	0.857731	0.725798
UCL chimera	95	0.944546	0.714047
UCL chimera	95	0.924509	0.655359
UCL chimera	95	0.88867	0.656862
UCL chimera	95	0.82758	0.621338
UCL chimera	95	0.843144	0.636964
UCL chimera	95	0.831223	0.623185
UCL chimera	95	0.926017	0.732276
UCL chimera	95	0.972304	0.763362
UCL chimera	95	0.904326	0.678204
UCL chimera	61	0.563887	0.273417
UCL chimera	61	0.720931	0.451854
UCL chimera	61	0.709432	0.431158
UCL chimera	82	0.737952	0.502855
UCL chimera	82	0.773459	0.565332
UCL chimera	82	0.779466	0.518837
UCL chimera	201	1.04131	0.932507
UCL chimera	201	0.926888	0.773855
UCL chimera	201	0.852477	0.756184
UCL chimera	201	0.958645	0.705824
UCL chimera	33	0.325122	0.104849
UCL chimera	33	0.380587	0.106671
UCL chimera	33	0.352731	0.117047
UCL chimera	47	0.526373	0.281418
UCL chimera	47	0.592856	0.313038
UCL chimera	47	0.569858	0.266794
UCL chimera	264	1.00727	0.855118
UCL chimera	264	0.875776	0.716475
UCL chimera	264	0.971806	0.858393
UCL chimera	264	1.0574	0.849224
UCL chimera	152	0.887963	0.722608
UCL chimera	152	0.86454	0.593598
UCL chimera	152	0.900607	0.729284
