# Supplementary material for: Differential impact of self and environmental antigens on the ontogeny and maintenance of CD4+ T cell memory
Source: eLife journal article supplement (doi:10.7554/elife.48901), 2019-11-19

**A**Total naive CD4<sup>+</sup> T cells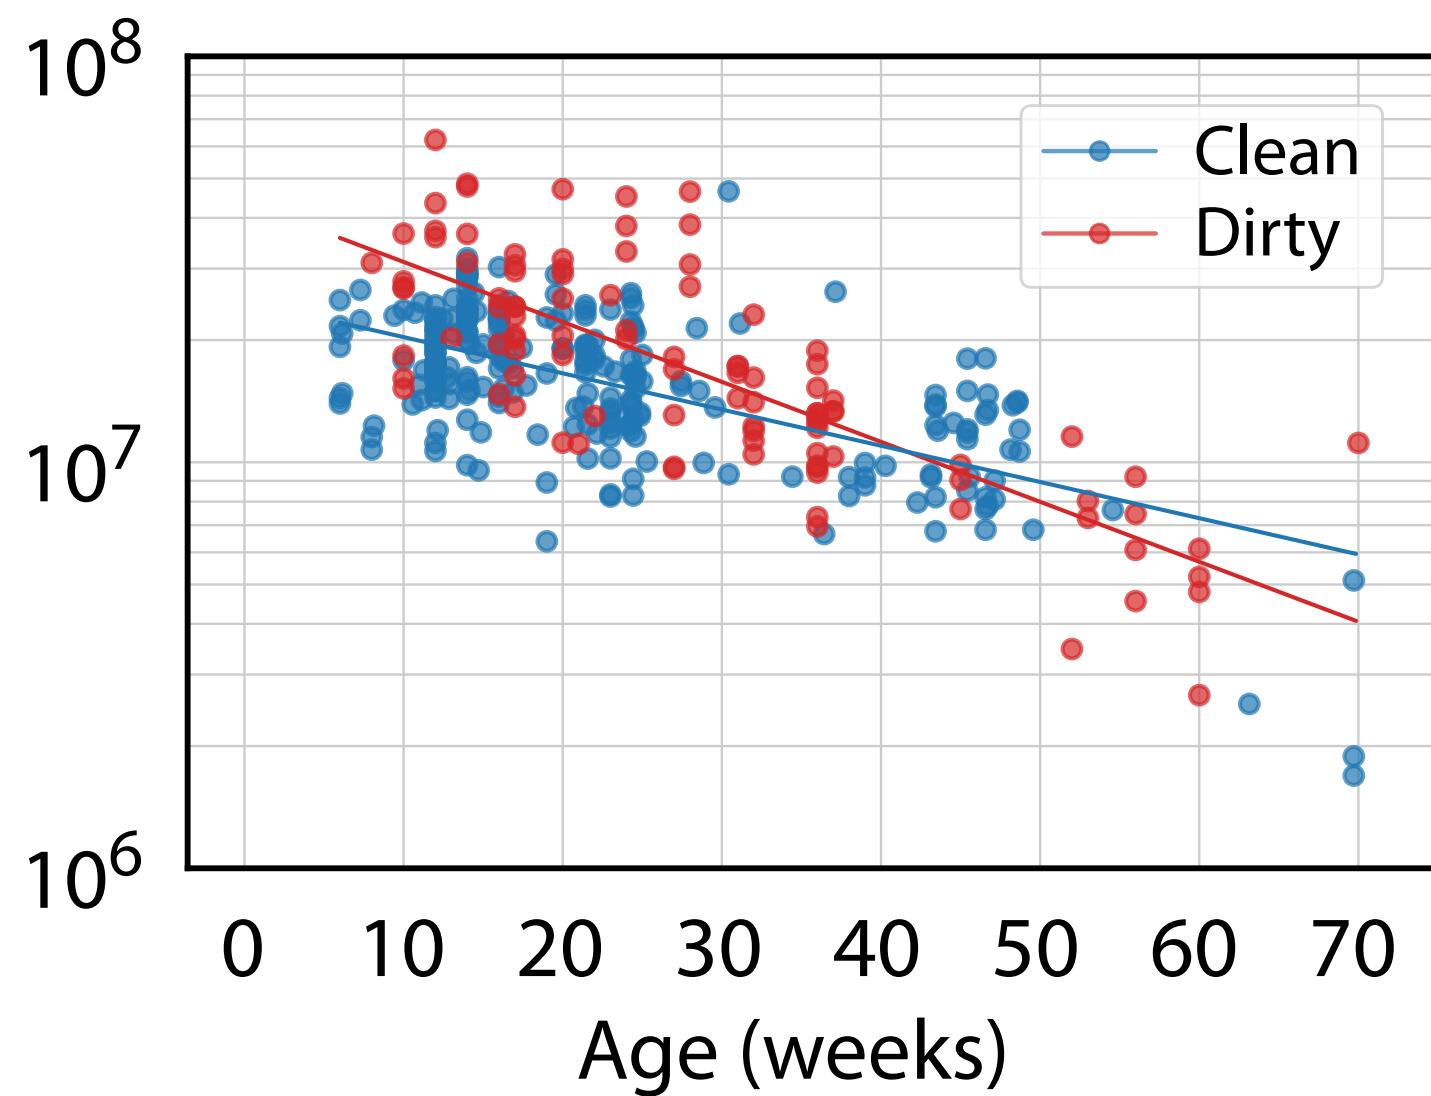**B**Total central memory CD4<sup>+</sup> T cells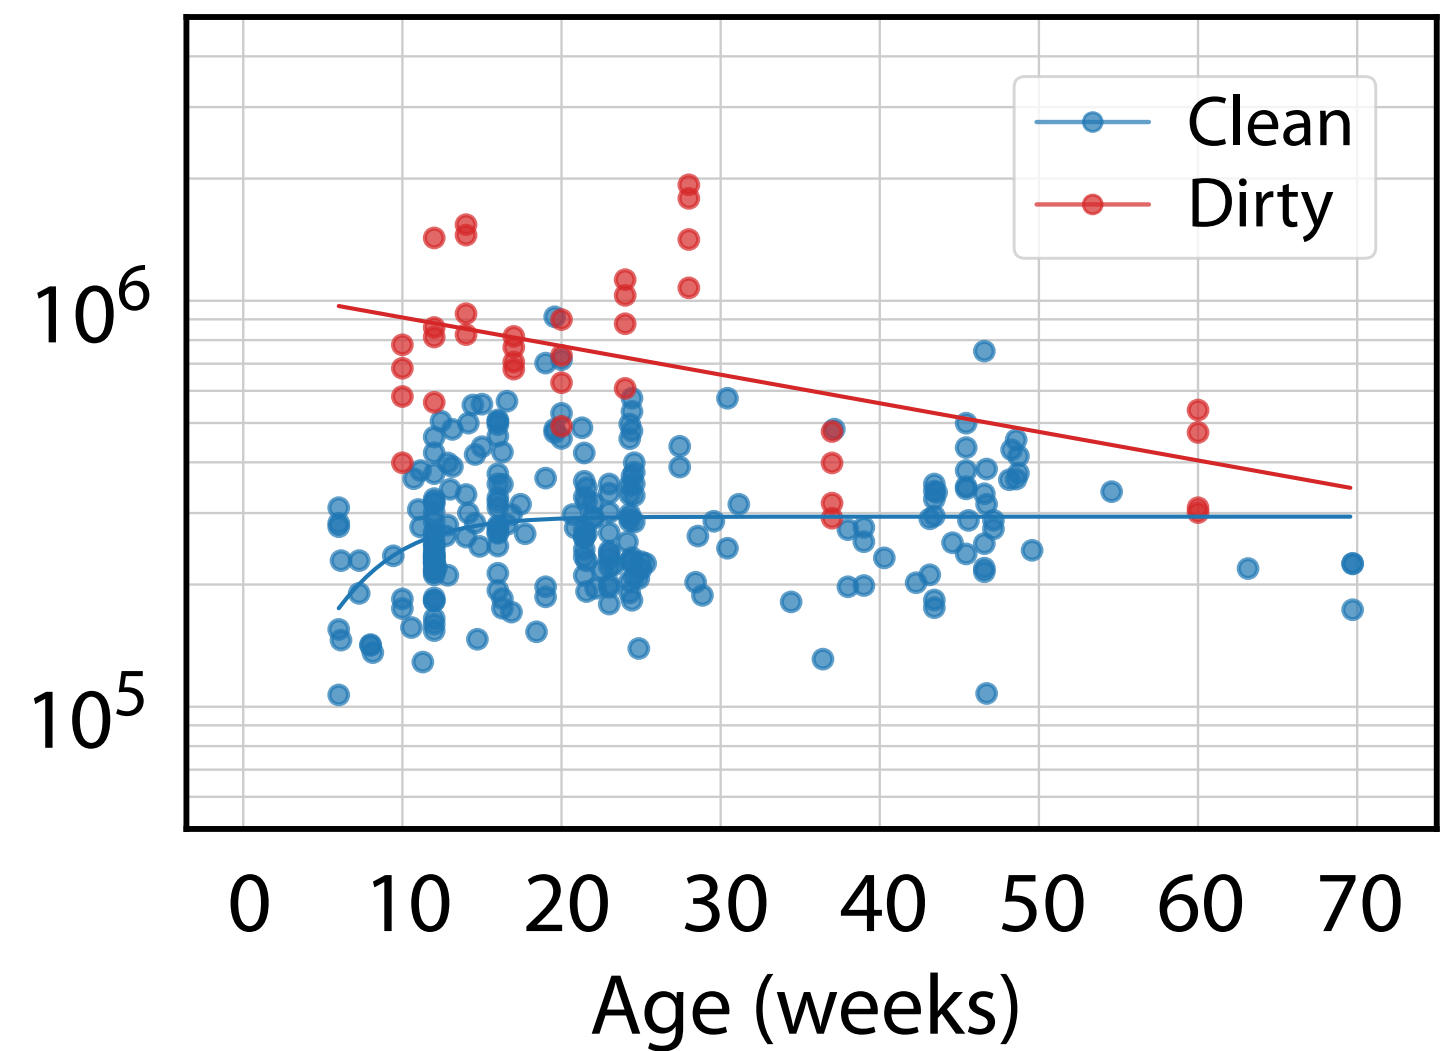**C**Naive CD4<sup>+</sup> donor fraction, normalised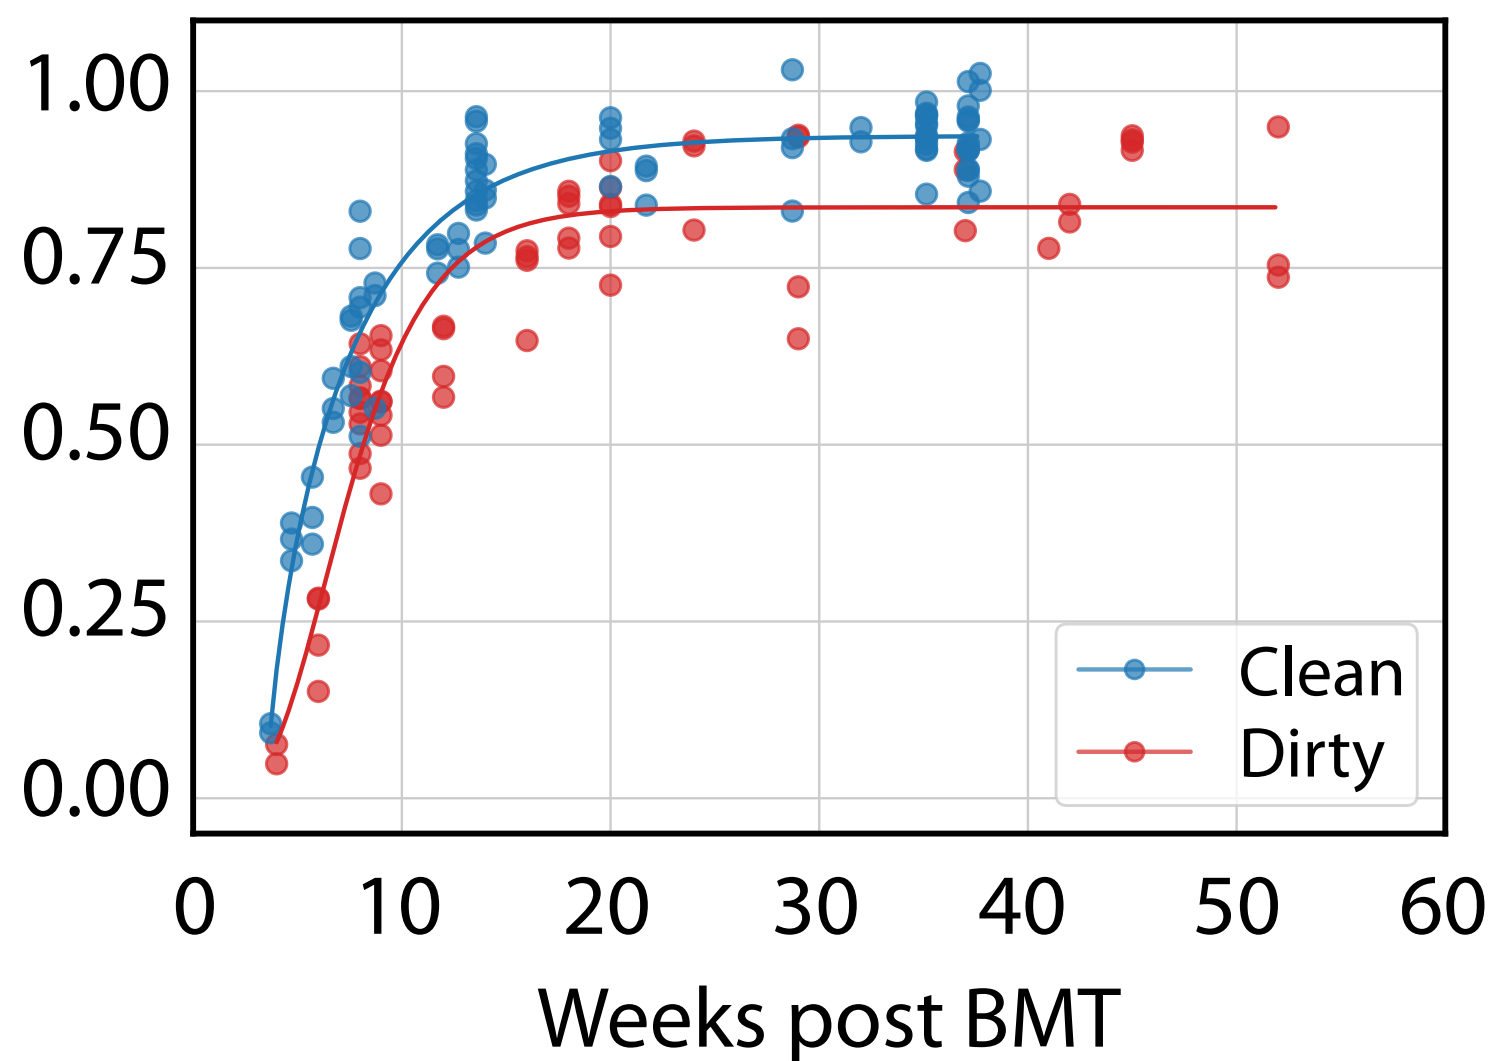**D**Central memory CD4<sup>+</sup> donor fraction, normalised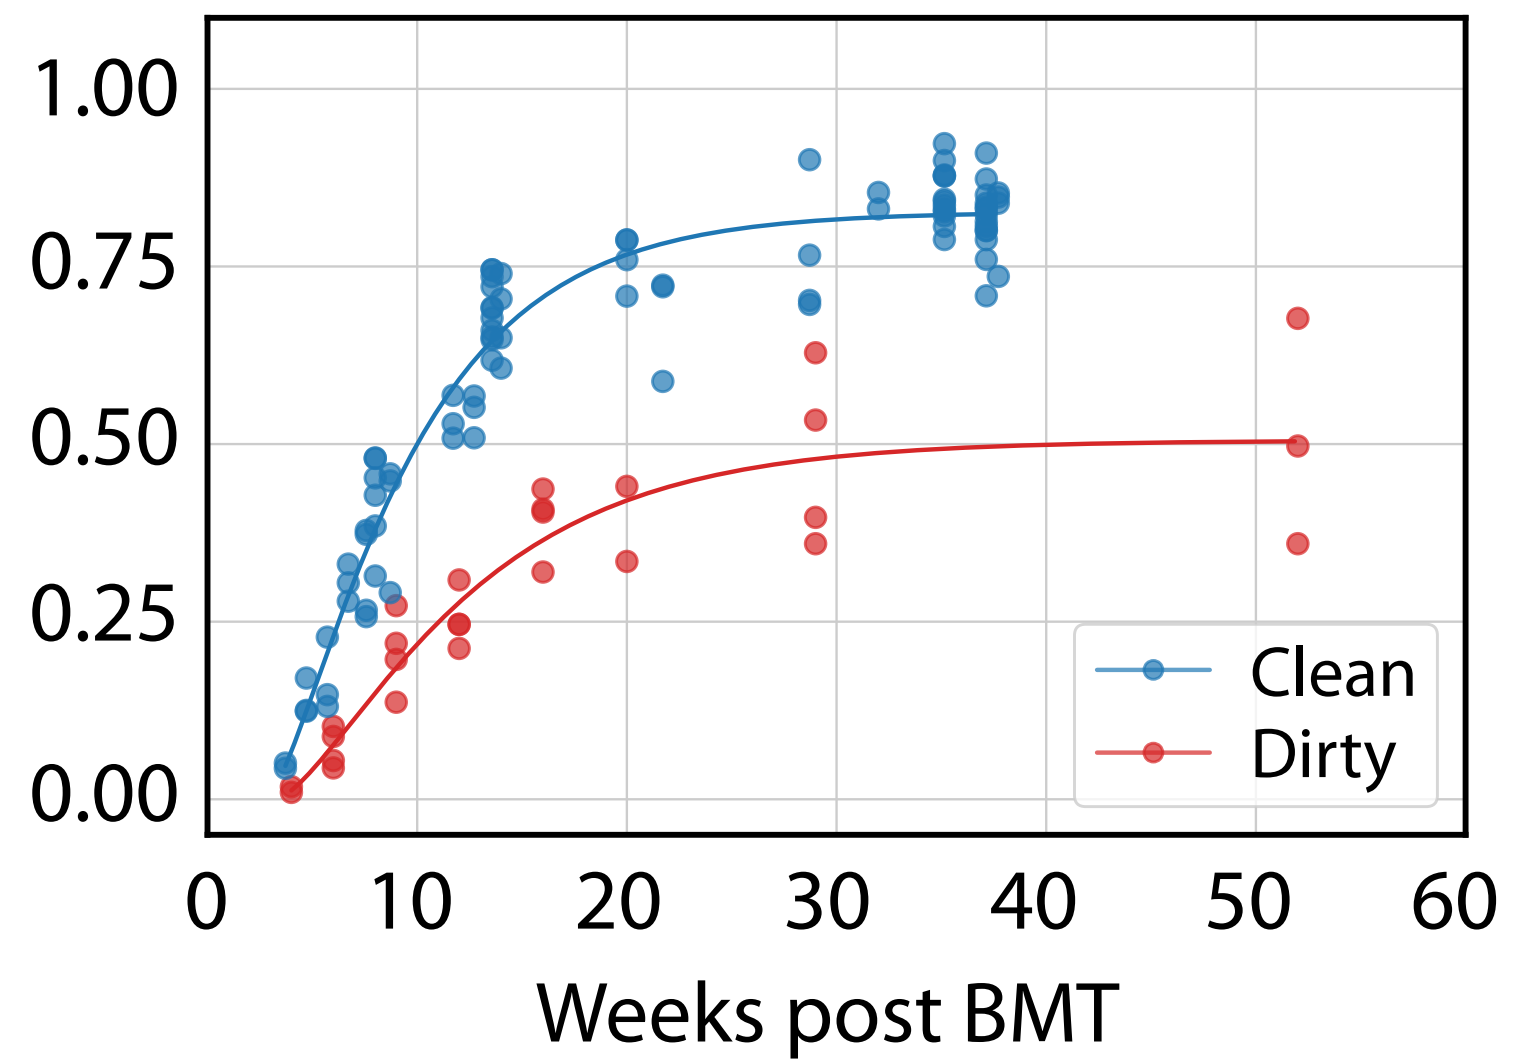

Supplement: supp [file elife-48901-supp-v1.zip]
