# Supplementary figures and images for: Differential impact of self and environmental antigens on the ontogeny and maintenance of CD4+ T cell memory
Source: eLife journal article supplement (doi:10.7554/elife.48901), 2019-11-19

### Central memory CD4<sup>+</sup> T cells

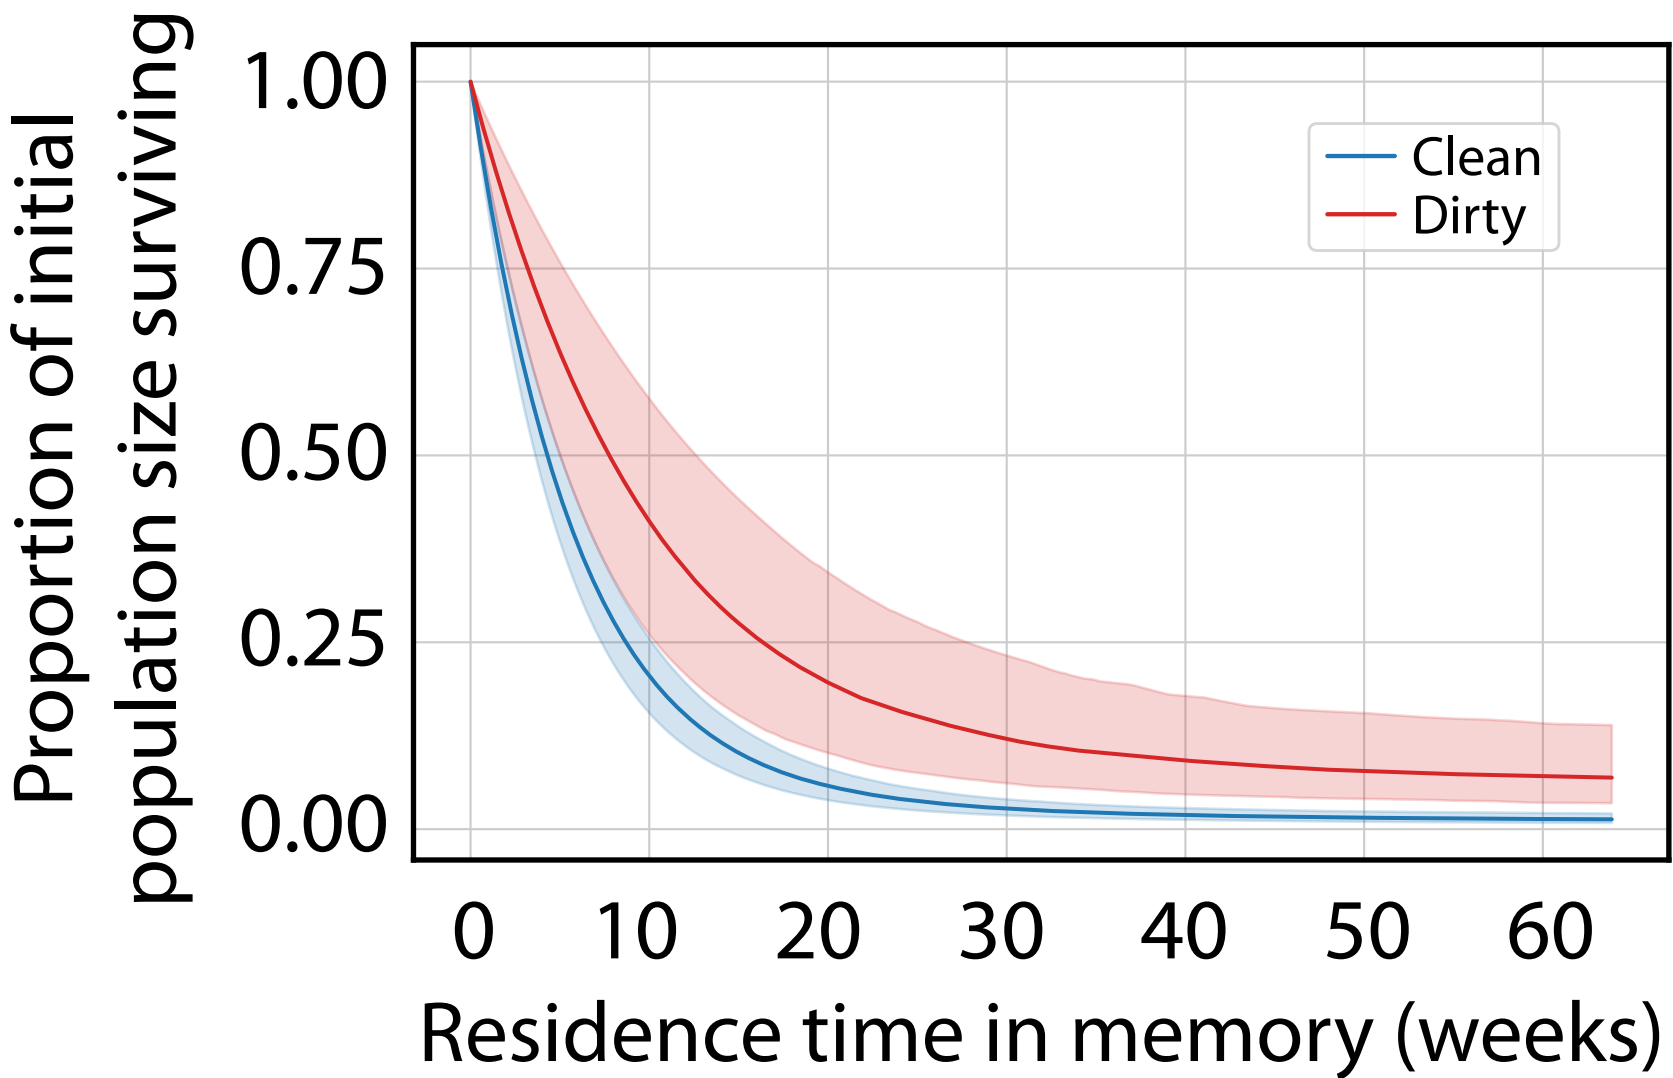

### Effector memory CD4<sup>+</sup> T cells

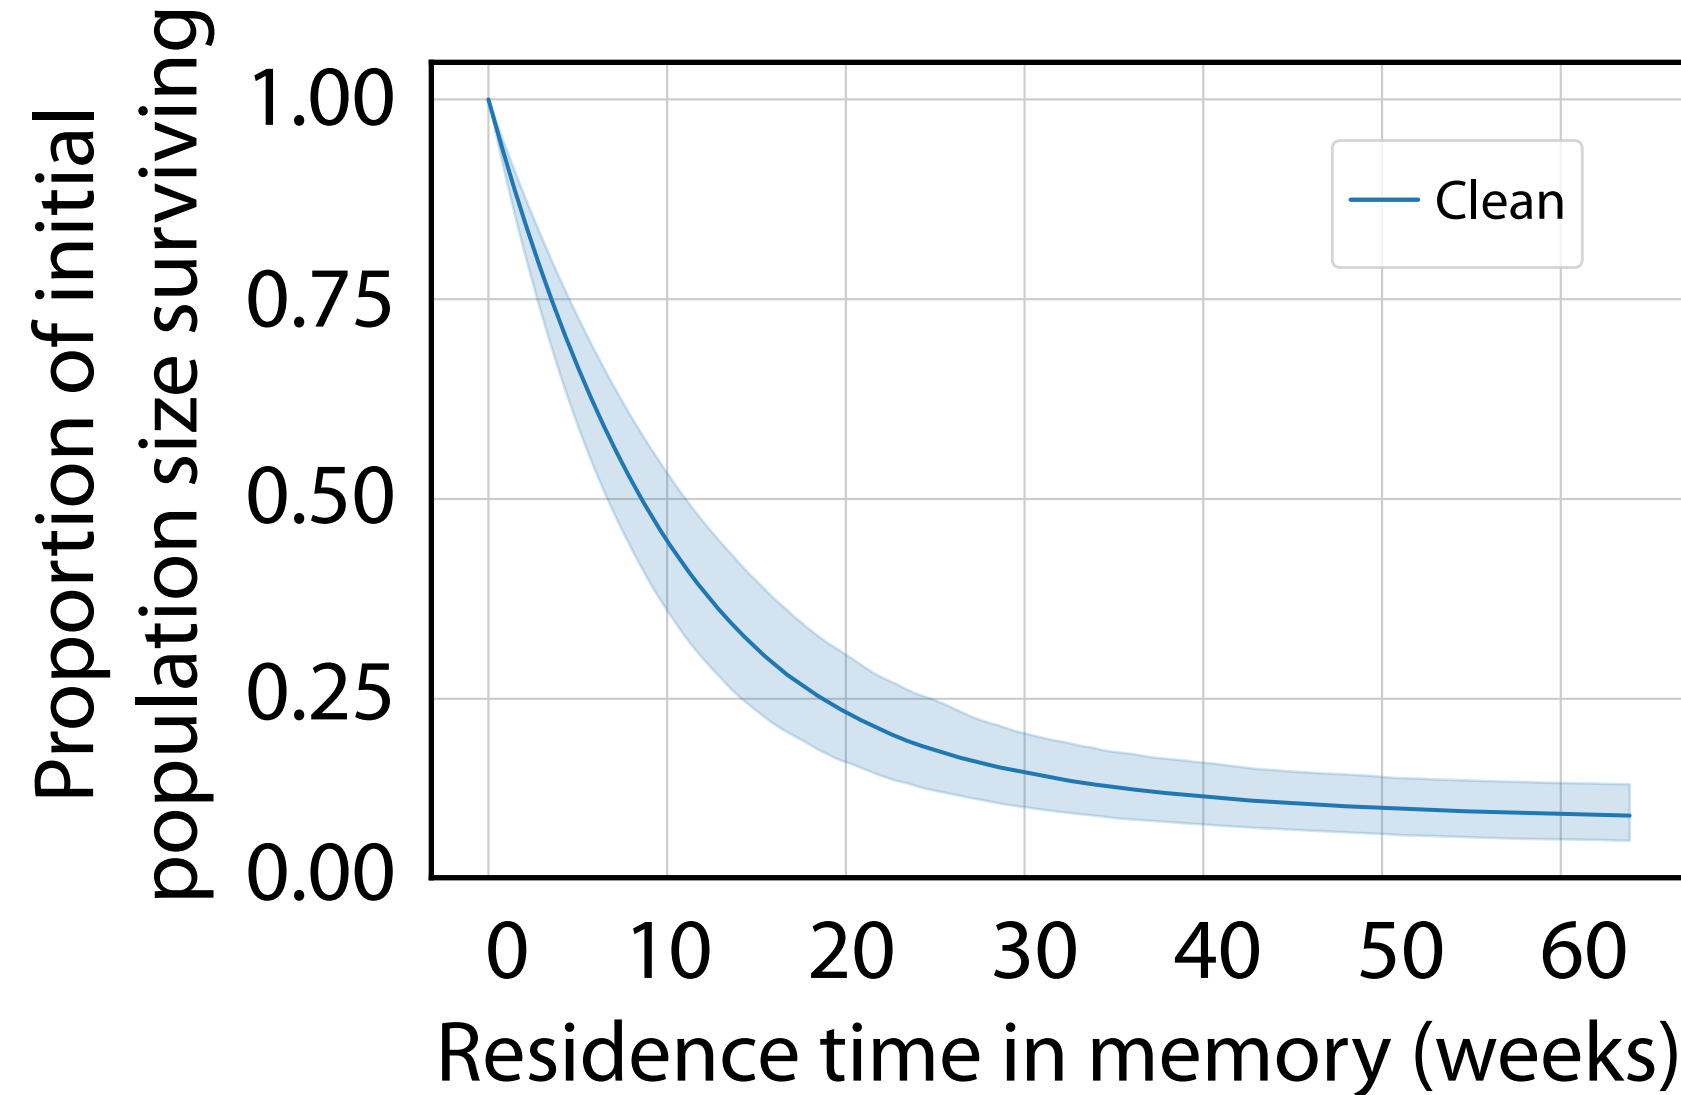

Supplement: supp [file elife-48901-supp-v1.zip]

Naive CD4<sup>+</sup> T cells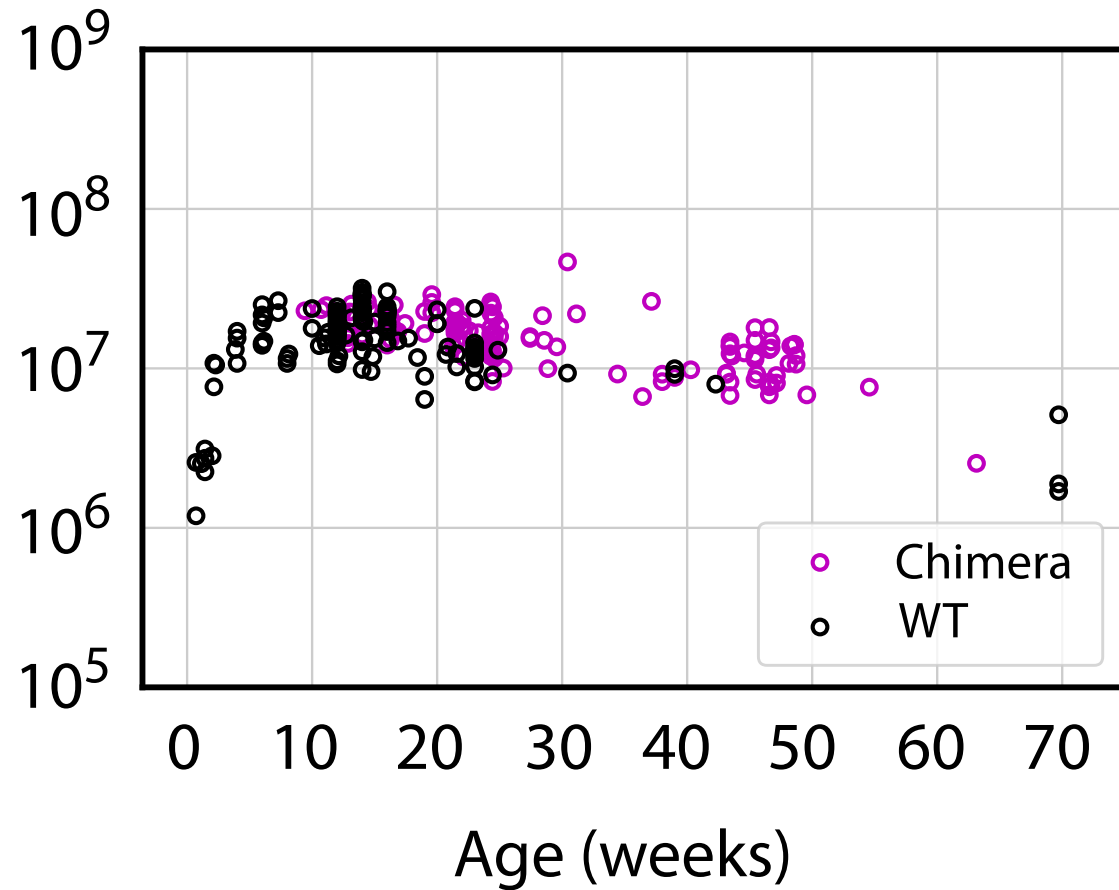Central memory CD4<sup>+</sup> T cells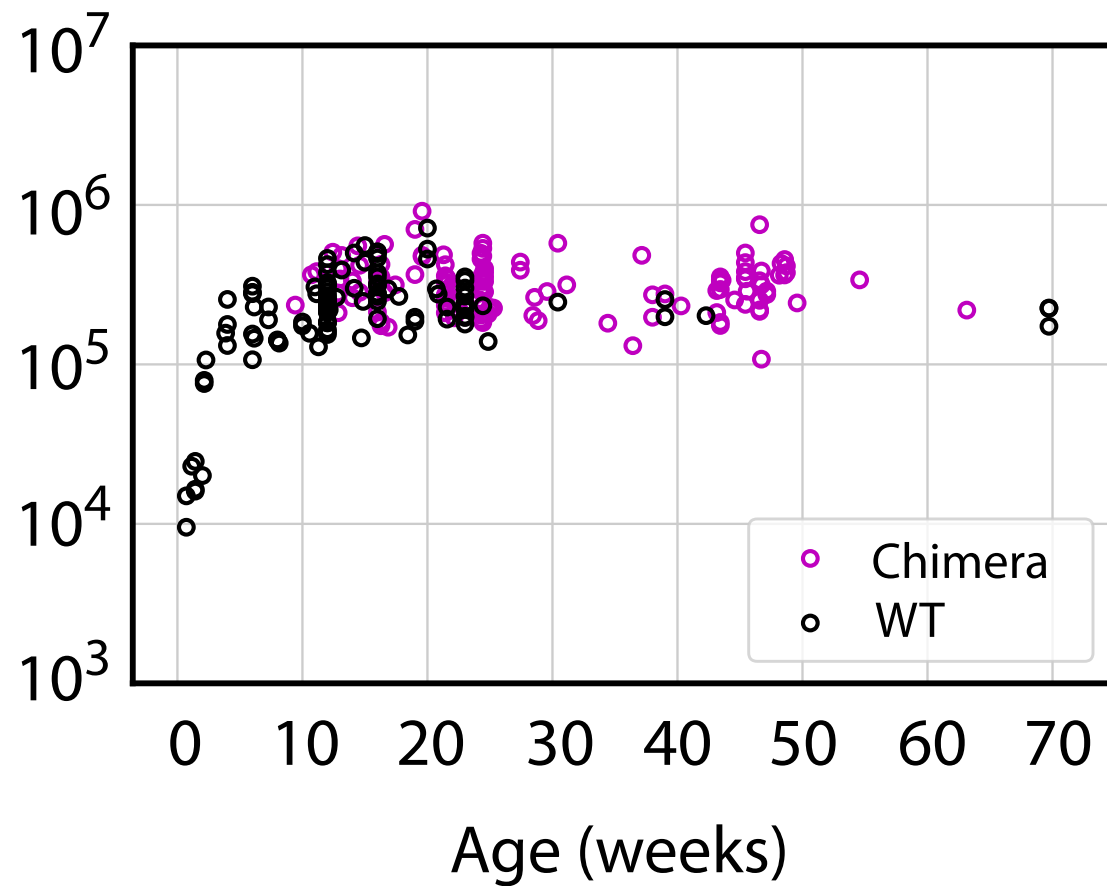Effector memory CD4<sup>+</sup> T cells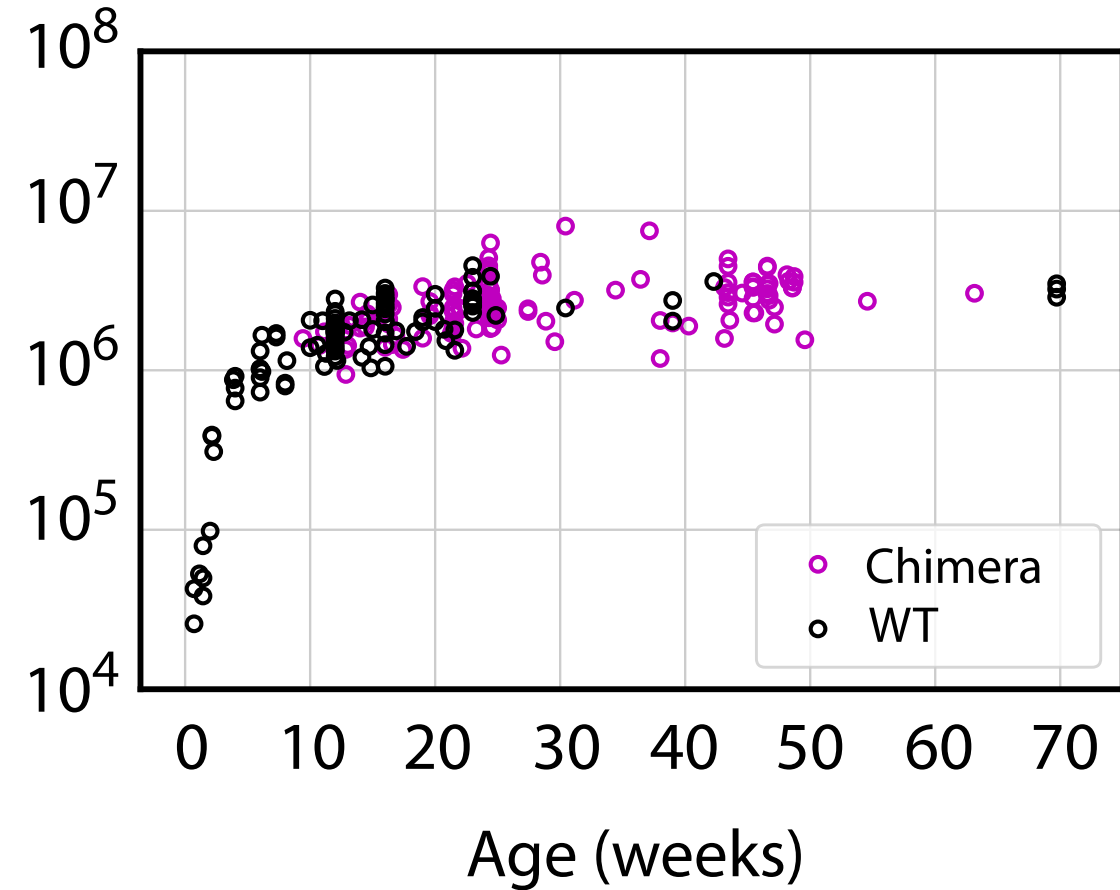

Supplement: supp [file elife-48901-supp-v1.zip]
